# Supplementary material for: SIRT1 at the crossroads of AKT1 and ERβ in malignant pleural mesothelioma cells
Source: PubMed Central journal article supplement (PMC4924721; doi:10.18632/oncotarget.7321), 2016-02-11
Supplement: oncotarget-07-14366-s001.pdf [file oncotarget-07-14366-s001.pdf]

## SUPPLEMENTARY FIGURE AND TABLE

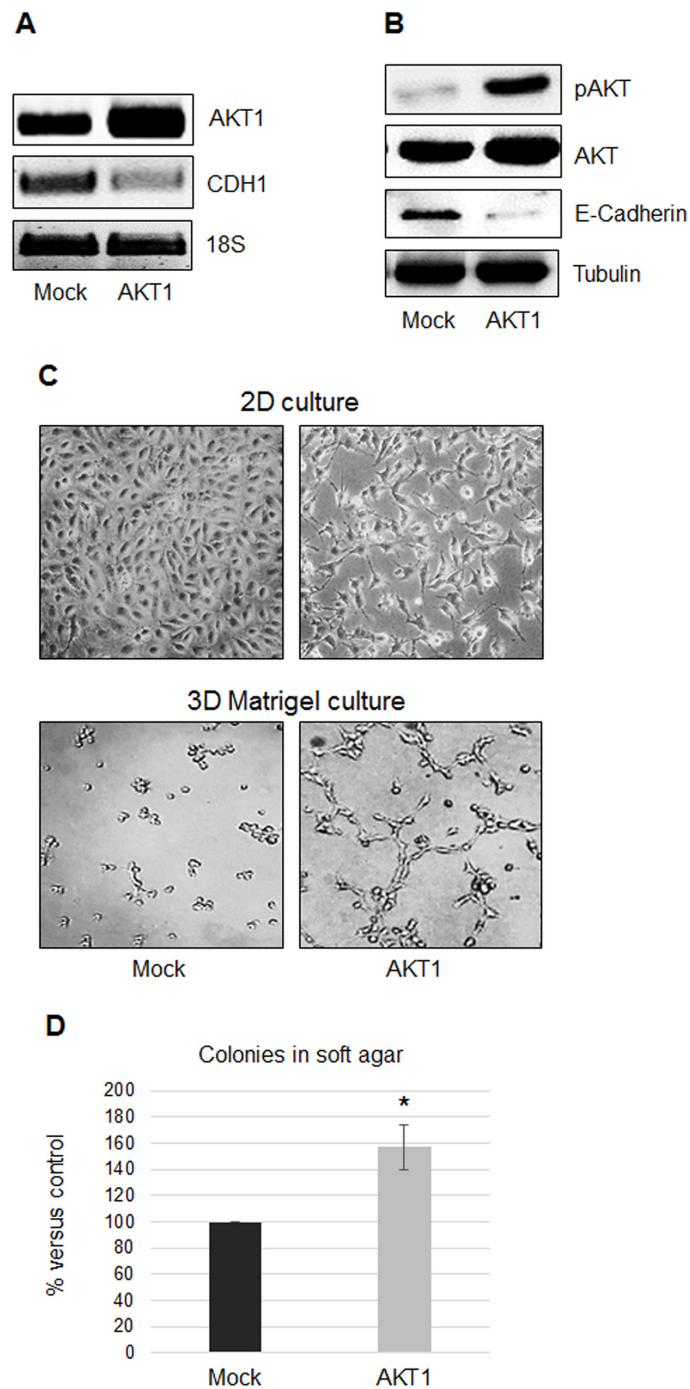**Supplementary Figure S1: AKT1 overexpression affects MPM cell morphology and anchorage-independent growth.**

**A.** Representative RT-PCR analyses of *AKT1* and *CDH1* in Mock or AKT1-HA transfected REN cells. 18S rRNA was used as housekeeping gene. **B.** Representative Western blot analyses of pAKT, AKT and E-Cadherin in Mock or AKT1-HA transfected REN cells. Tubulin was used as loading control. **C.** Phase contrast images (200X magnification) of Mock or AKT1-HA transfected REN cells grown on untreated plastic or Matrigel coated dishes for 24 hours. **D.** Soft agar colony counts in Mock or in AKT1-HA transfected REN cells. Columns represent the percentage of the mean number of colonies versus control  $\pm$  s.d.; \*  $p < 0.05$ .

Supplementary Table S1: Sequences of primers used for RT-PCR assays

| GENE         | PRIMER FORWARD                        | PRIMER REVERSE                        |
|--------------|---------------------------------------|---------------------------------------|
| <i>18S</i>   | 5'-AAA CGG CTA CCA CAT CCA AG-3'      | 5'-CCT CCA ATG GAT CCT CGT TA-3'      |
| <i>AKT1</i>  | 5'- GCT GGA CGA TAG CTT GGA-3'        | 5'-GAT GAC AGA TAG CTG GTG-3'         |
| <i>AKT3</i>  | 5'- GCA AGT GGA CGA GAA TAA GTC TC-3' | 5'- ACA ATG GTG GGC TCA TGA CTT CC-3' |
| <i>CDH1</i>  | 5'-TGG GCT GGA CCG AGA GAG TT-3'      | 5'-ATC TCC AGC CAG TTG GCA GT-3'      |
| <i>SIRT1</i> | 5'-CTG GAC AAT TCC AGC CAT CT-3'      | 5'-GGG TGG CAA CTC TGA CAA AT-3'      |
| <i>FOXMI</i> | 5'-AAC CGC TAC TTG ACA TTG G-3'       | 5'-GCA GTG GCT TCA TCT TCC-3'         |
